# Supplementary material
Source: Royal Society of Chemistry journal article supplement (doi:10.1039/d6gc02747d)
Supplement: d6gc02747d1.pdf [file d6gc02747d1.pdf]

## Supplementary Information

### **Fabrication of Ammonium Dinitramide/Si Energetic Coparticles from Silicon Waste with Enhanced Combustion Heat and Ignition Performance**

Chenxi Qu<sup>ab</sup>, Qian Liu<sup>b</sup>, Jianhua Bu<sup>b</sup>, Kewei Ding<sup>\*b</sup>, Songsong Guo<sup>b</sup>, Na Li<sup>b</sup>, Hexin Liu<sup>b</sup>, Hansheng Li<sup>a</sup>, Jian Lv<sup>b</sup>

<sup>a</sup> *School of Chemistry and Chemical Engineering, Beijing Institute of Technology, Beijing 100081, China.*

<sup>b</sup> *Xi'an Modern Chemistry Research Institute, Xi'an 710065, China. Email: dkw204@163.com*

## Table of Contents

|                                                                                                                |   |
|----------------------------------------------------------------------------------------------------------------|---|
| Preparation of ADN/Silicon waste composites.....                                                               | 1 |
| Figure S1. (a) SEM images and EDS analysis of RSi; (b) Particle size distribution of RSi.....                  | 1 |
| Figure S2. XRD patterns of RSi .....                                                                           | 2 |
| Figure S3. SEM images and EDS analysis of (a) ADN/RSi-30, (b) ADN/RSi-50 and (c) ADN/RSi-80 .....              | 3 |
| Figure S4. XRD patterns of ADN/RSi coparticles .....                                                           | 3 |
| Figure S5. SEM images and EDS analysis of ADN/RSi-Fe.....                                                      | 3 |
| Figure S6. SEM images and EDS analysis of ADN/RSi-SiC.....                                                     | 4 |
| Figure S7. XRD patterns of ADN/RSi-Fe sample .....                                                             | 4 |
| Figure S8. XRD patterns of ADN/RSi-SiC sample .....                                                            | 4 |
| Figure S9. TG-DSC-MS-FTIR analysis of ADN/RSi-80 .....                                                         | 5 |
| Figure S10. TG-DSC-MS-FTIR analysis of 5%wt ADN/RSi-Fe.....                                                    | 5 |
| Figure S11. TG-DSC-MS-FTIR analysis of 5%wt ADN/RSi-SiC.....                                                   | 5 |
| Figure S12. DSC curves of ADN/RSi-80 at different heating rates (5, 10, 15, and 20 K/min) .....                | 5 |
| Figure S13. Laser ignition delay times of ADN/RSi, ADN/RSi-Fe and ADN/RSi-SiC composites.....                  | 6 |
| Table S1. ICP-MS Detection Results of Elements in RSi Sample .....                                             | 7 |
| Table S2. Decomposition Kinetic Parameters of ADN/RSi-80 sample .....                                          | 8 |
| Table S3. Combustion heat and mechanical sensitivity of ADN/RSi, ADN/RSi+Fe and , ADN/RSi+SiC composites ..... | 8 |

## Preparation of ADN/Silicon waste composites

### Materials

Photovoltaic silicon kerf waste powder (RSi) was provided by Sichuan Yongxiang Photovoltaic Technology Co., Ltd. Leshan, China. Silicon carbide (SiC) powder (500–800 mesh) and Fe-containing alloy powder (spherical 316L stainless steel) were provided by Zhongmai Metal Materials Co., Ltd. (Shijiazhuang, China). All other reagents used in this section were consistent with those described for the commercial silicon powder system.

### Composite Preparation

The silicon surface pretreatment protocol and the fabrication procedure of ADN/RSi composite samples were identical to those established for commercial silicon powder-based ADN/Si composites. Briefly, ADN/RSi composites with a fixed ADN mass fraction of 80% were first prepared via the solution infiltration and solvent evaporation method described above. Subsequently, SiC powder and 316L stainless steel powder were separately doped into the as-prepared ADN/RSi-80 composite at a mass fraction of 5%, yielding the impurity-containing ADN/RSi-SiC and ADN/RSi-Fe samples, respectively.

The characterization methodologies and performance testing protocols for all ADN/RSi series samples were fully consistent with those applied to the aforementioned ADN/Si composite samples.

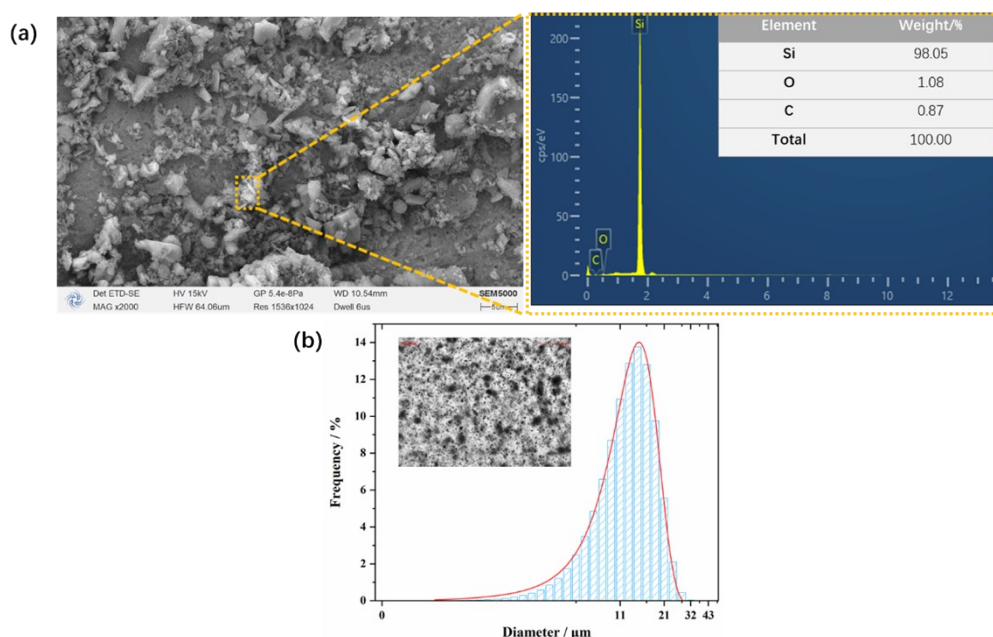

**Figure S1. (a) SEM images and EDS analysis of RSi; (b) Particle size distribution of RSi**

Particle size distribution analysis of silicon waste samples was performed using an Online 2D Imaging Probe (Pharmavision (Qingdao) Intelligent Technology Co., Ltd.). 500 mg of RSi sample was dispersed in 100 mL of ethanol solution. Images were acquired at a rate of 30 fps, with synchronous capture of static photographic images, and the corresponding particle size distribution data were collected.

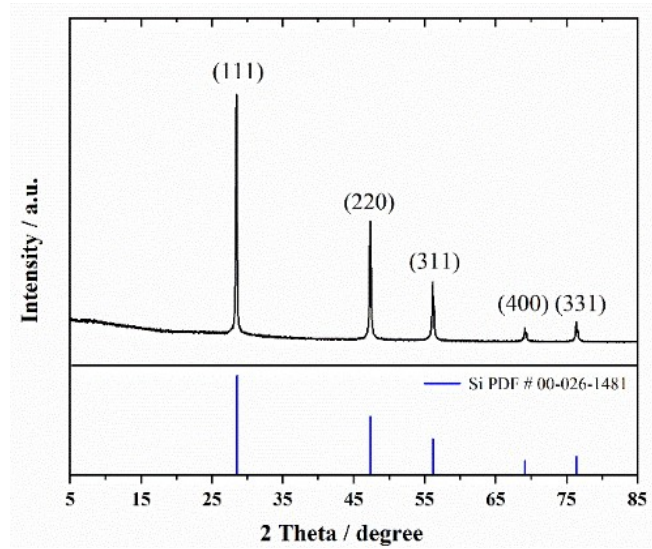

**Figure S2. XRD patterns of RSi**

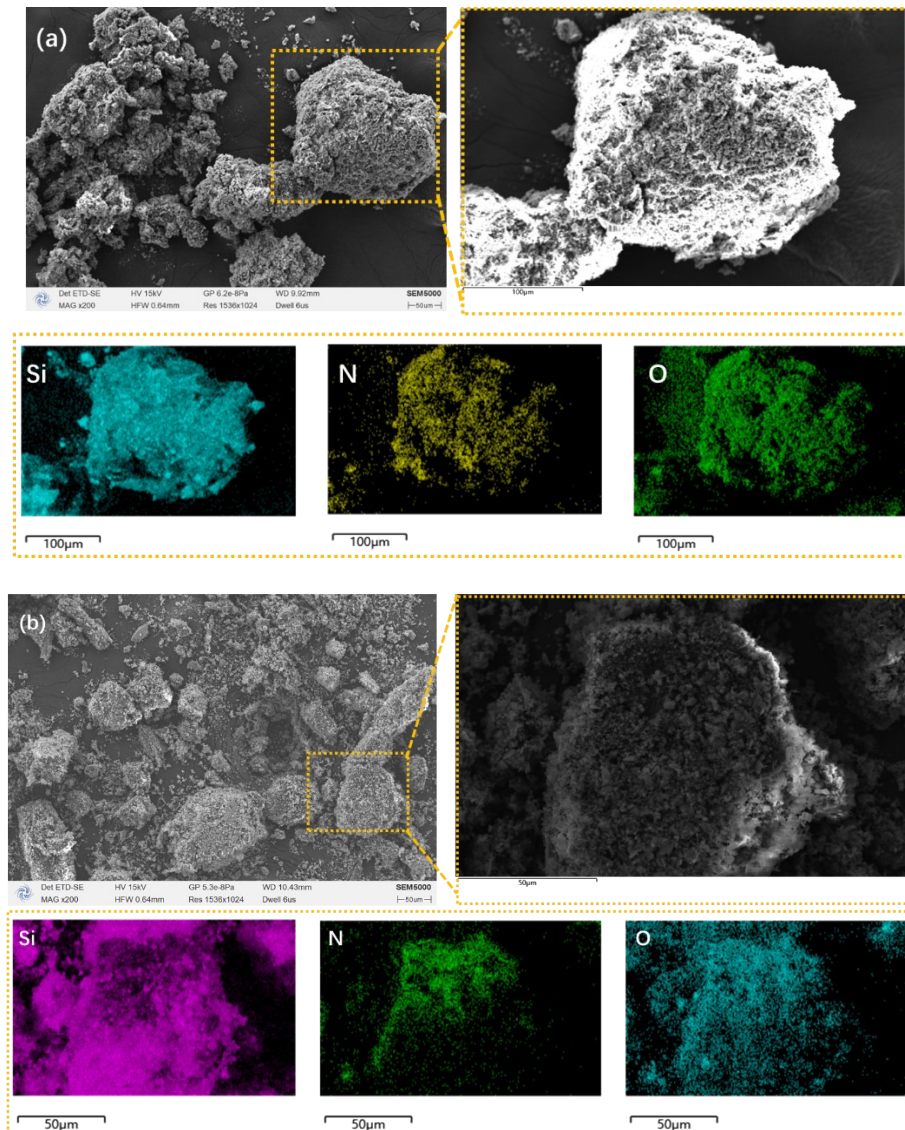

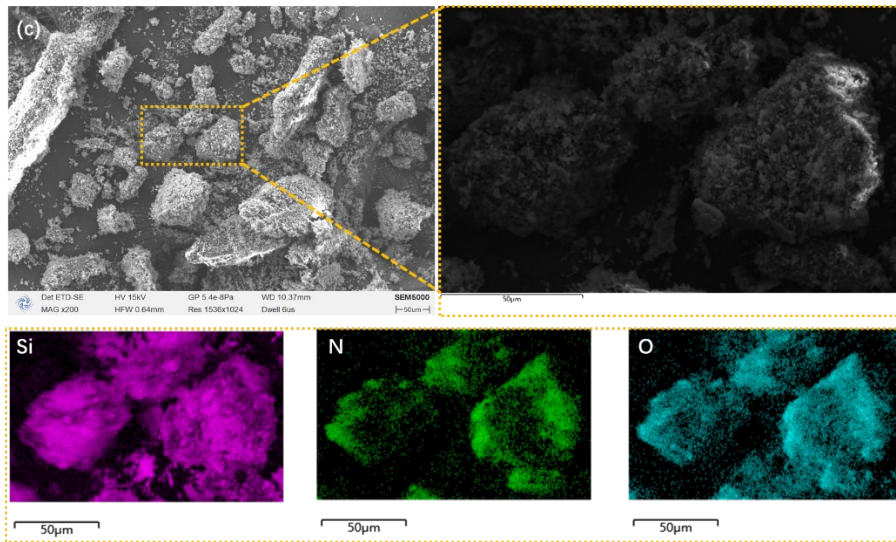

**Figure S3. SEM images and EDS analysis of (a) ADN/RSi-30, (b) ADN/RSi-50 and (c) ADN/RSi-80**

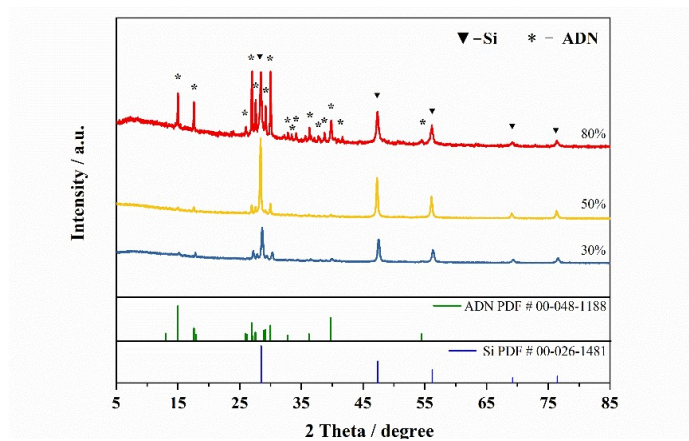

**Figure S4. XRD patterns of ADN/RSi coparticles**

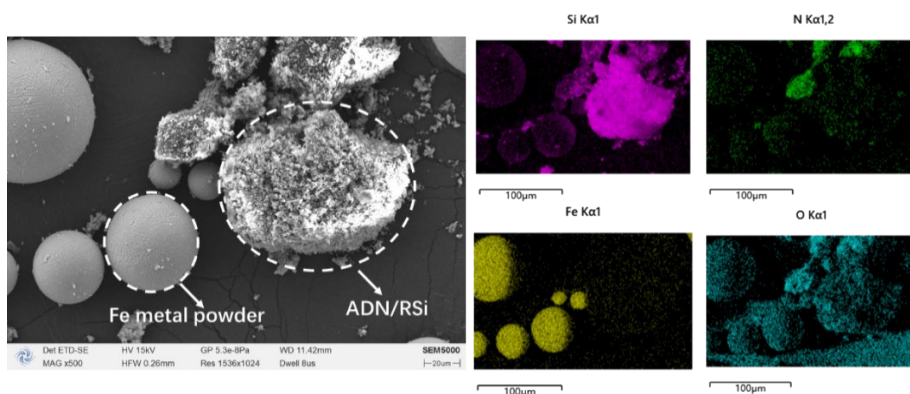

**Figure S5. SEM images and EDS analysis of ADN/RSi-Fe**

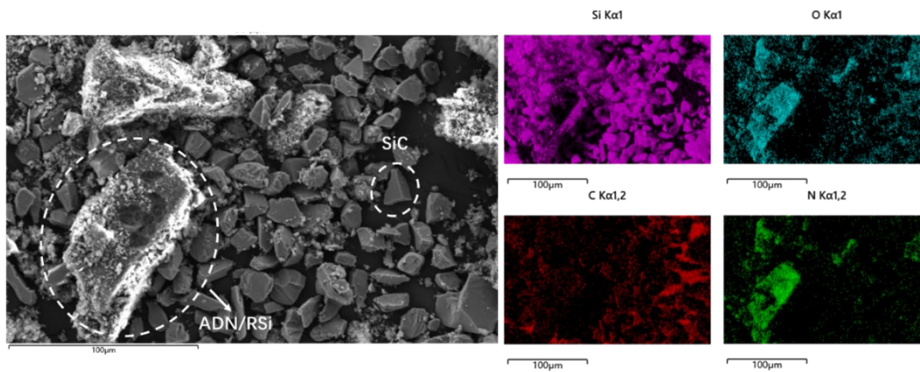

**Figure S6. SEM images and EDS analysis of ADN/RSi-SiC**

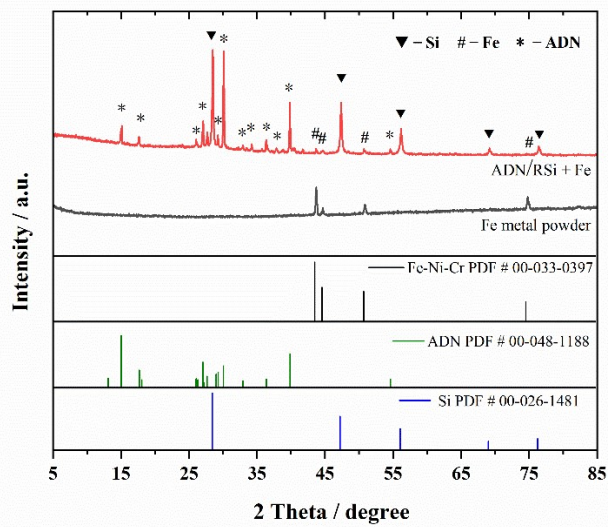

**Figure S7. XRD patterns of ADN/RSi-Fe sample**

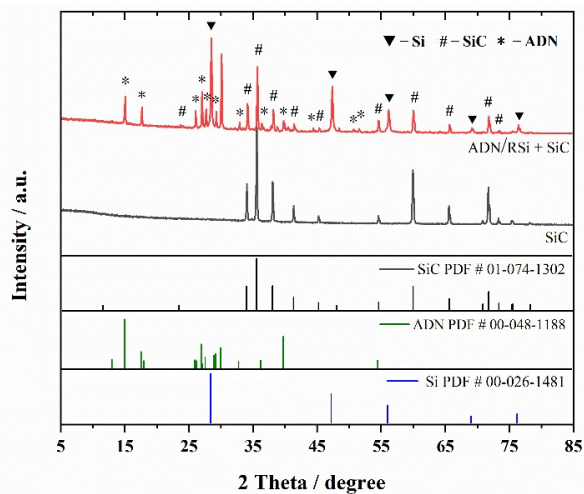

**Figure S8. XRD patterns of ADN/RSi-SiC sample**

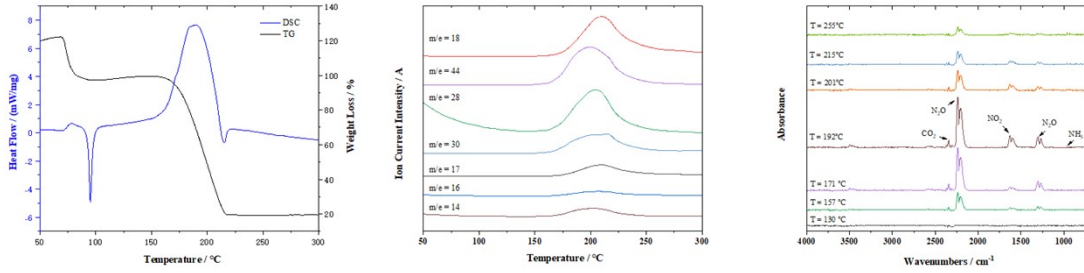

Figure S9. TG-DSC-MS-FTIR analysis of ADN/RSi-80

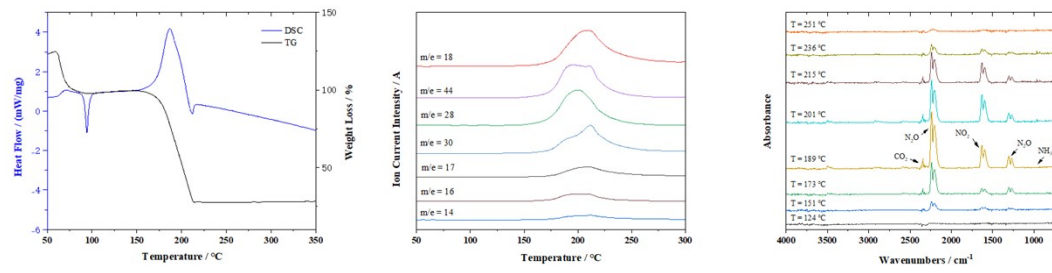

Figure S10. TG-DSC-MS-FTIR analysis of 5%wt ADN/RSi-Fe

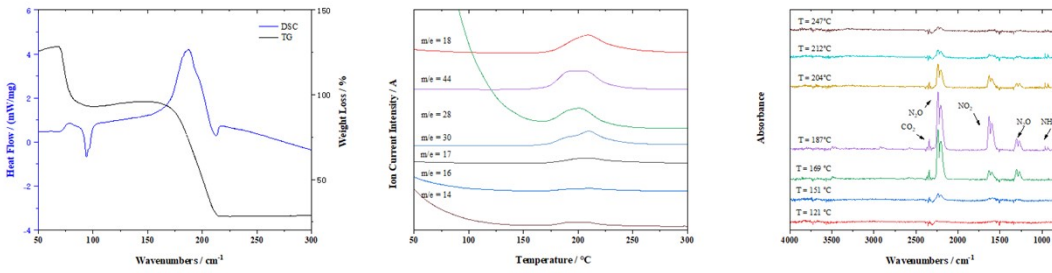

Figure S11. TG-DSC-MS-FTIR analysis of 5%wt ADN/RSi-SiC

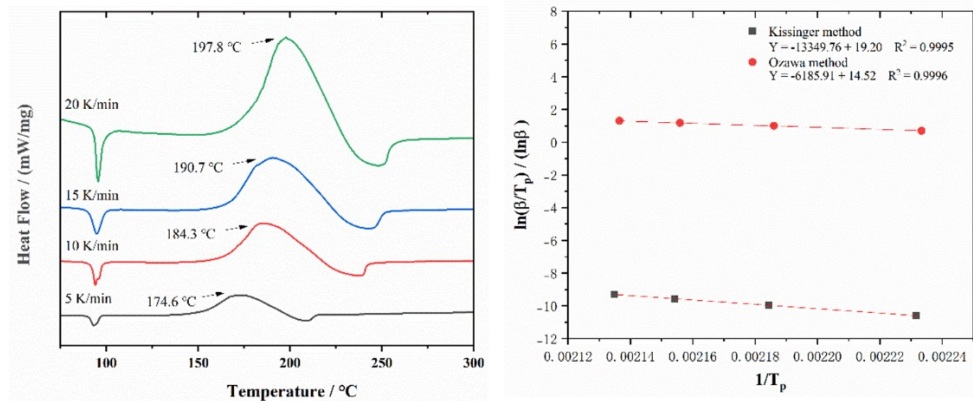

Figure S12. DSC curves and Linear fitting plots of ADN/RSi-80 at different heating rates (5, 10, 15, and 20 K/min)

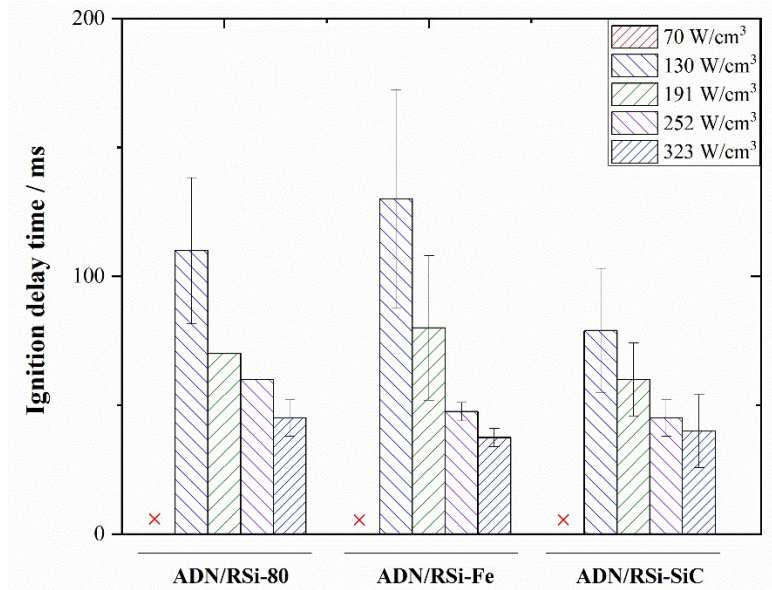

**Figure S13. Laser ignition delay times of ADN/RSi, ADN/RSi-Fe and ADN/RSi-SiC composites**

**Table S1. ICP-MS Detection Results of Elements in RSi Sample**

| Element | Monitored m/z | Sample Mass (g) | Dilution Factor | Measured Concentration in Solution (C <sub>0</sub> , µg/L) | Elemental Concentration in Sample (C <sub>s</sub> , µg/kg) | Mass Fraction (%)     |
|---------|---------------|-----------------|-----------------|------------------------------------------------------------|------------------------------------------------------------|-----------------------|
| Si      | 28            | 0.0527          | 1000            | 2094.69                                                    | 993687.8                                                   | 0.9937                |
| Al      | 27            | 0.3545          | 10              | 89.21                                                      | 62909.11                                                   | 0.00629               |
| Ca      | 40            | 0.3545          | 1               | 3220.4                                                     | 227108.6                                                   | 0.02271               |
| Fe      | 56            | 0.3545          | 1               | 127.48                                                     | 8967                                                       | 0.000897              |
| Na      | 23            | 0.3545          | 1               | 1033.56                                                    | 72888.26                                                   | 0.00729               |
| K       | 39            | 0.3545          | 1               | 512.5                                                      | 36142.23                                                   | 0.00361               |
| Mg      | 24            | 0.3545          | 1               | 602.76                                                     | 42507.66                                                   | 0.00425               |
| S       | 32            | 0.0527          | 1               | 0.28                                                       | 131.12                                                     | 0.00013               |
| B       | 11            | 0.3545          | 1               | 71.12                                                      | 5015.76                                                    | 5.02×10 <sup>-6</sup> |
| P       | 31            | 0.3545          | 1               | 238.36                                                     | 16828.64                                                   | 1.68×10 <sup>-5</sup> |
| Pb      | 208           | 0.3545          | 1               | 38.52                                                      | 2714.18                                                    | 2.71×10 <sup>-6</sup> |
| Ti      | 48            | 0.3545          | 1               | 67.76                                                      | 4770.59                                                    | 4.77×10 <sup>-6</sup> |
| Zn      | 66            | 0.3545          | 1               | 1.8                                                        | 126.4                                                      | 1.26×10 <sup>-7</sup> |
| Hg      | 202           | 0.3545          | 1               | 0.085                                                      | 5.98                                                       | 5.98×10 <sup>-9</sup> |

**Elemental Analysis Methodology for Silicon Sample (ICP-MS)**

The elemental analysis of the silicon sample (sample ID: si) was performed using an Agilent 7800 Inductively Coupled Plasma-Mass Spectrometry (ICP-MS) instrument. The flow rates of the carrier gas and auxiliary gas (both high-purity argon, Ar) were 1.00 L/min, and the pump speed was 20 r/min.

For sample pretreatment, the sample mass used for the determination of silicon (Si) and sulfur (S) was 0.0527 g, while 0.3545 g of sample was used for the analysis of other elements. All digested samples were volumetrically made up to 25 mL with ultrapure water. The dilution factors applied were 1000-fold for Si, 10-fold for aluminum (Al), and 1-fold for the remaining elements.

**Table S2. Decomposition Kinetic Parameters of ADN/RSi-80 sample**

| Sample     | $\beta$ (K · min <sup>-1</sup> ) | T <sub>p</sub> (°C) | E <sub>k</sub> (kJ/mol)            | lnA (s <sup>-1</sup> ) | E <sub>o</sub> (kJ/mol)            |
|------------|----------------------------------|---------------------|------------------------------------|------------------------|------------------------------------|
| ADN/RSi-80 | 5                                | 174.6               | 111.0<br>(R <sup>2</sup> = 0.9997) | 28.7                   | 112.6<br>(R <sup>2</sup> = 0.9993) |
|            | 10                               | 184.3               |                                    |                        |                                    |
|            | 15                               | 190.7               |                                    |                        |                                    |
|            | 20                               | 195.1               |                                    |                        |                                    |

**Table S3. Combustion heat and mechanical sensitivity of ADN/RSi, ADN/RSi+Fe and ADN/RSi+SiC composites**

| Sample      | IS / J | FS / N | Combustion heat / (J/g) |
|-------------|--------|--------|-------------------------|
| ADN/RSi-30  | 20     | 252    | 5526                    |
| ADN/RSi-50  | 13     | 144    | 8673                    |
| ADN/RSi-80  | 6      | 108    | 11980                   |
| ADN/RSi-Fe  | 25     | 96     | 10889                   |
| ADN/RSi-SiC | 18     | 108    | 11193                   |
